# Supplementary material for: Impacts of Horizontal Resolution and Air–Sea Flux Parameterizationon the Intensity and Structure of simulated Typhoon Haiyan (2013)
Source: Copernicus journal article supplement (doi:10.5194/nhess-2018-333), 2019-01-02
Supplement: Supplementary file [file nhess-2018-333-AC6-supplement.pdf]

## Effects of Horizontal Resolution and Air–Sea Flux Parameterization on the Intensity and Structure of simulated Typhoon Haiyan (2013)

Kueh et al.

This supplement contains 2 figures to show the tracks and central positions of the simulated typhoon Haiyan during the mature stage.

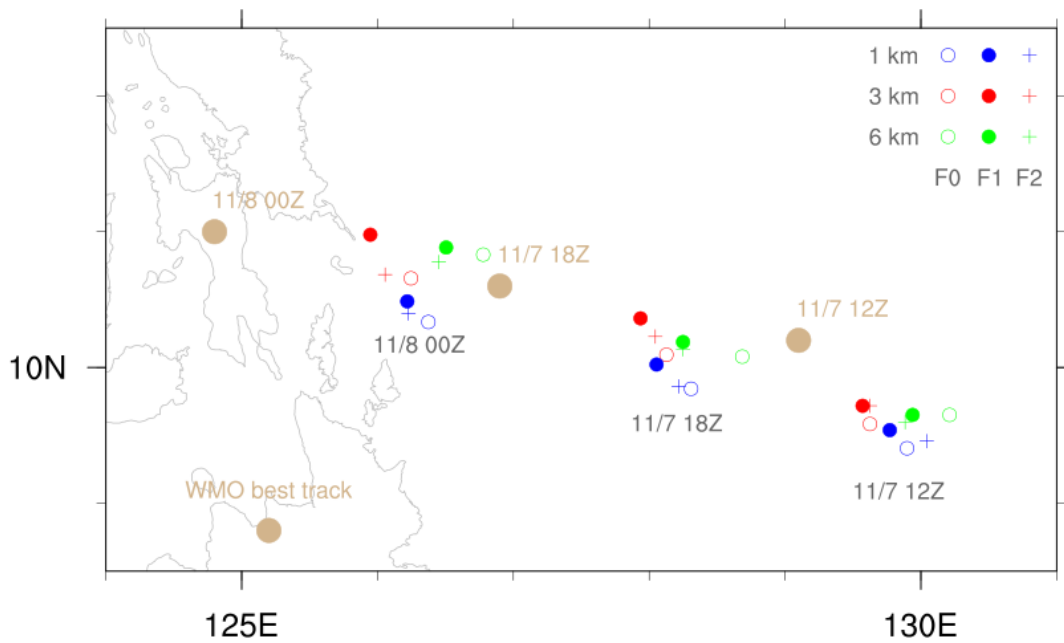

Fig. S1. The central positions of simulated Haiyan during the time period from 1200UTC 7 November 2013 to 0000UTC 8 November 2013. The dots in tan denote the WMO best track positions.

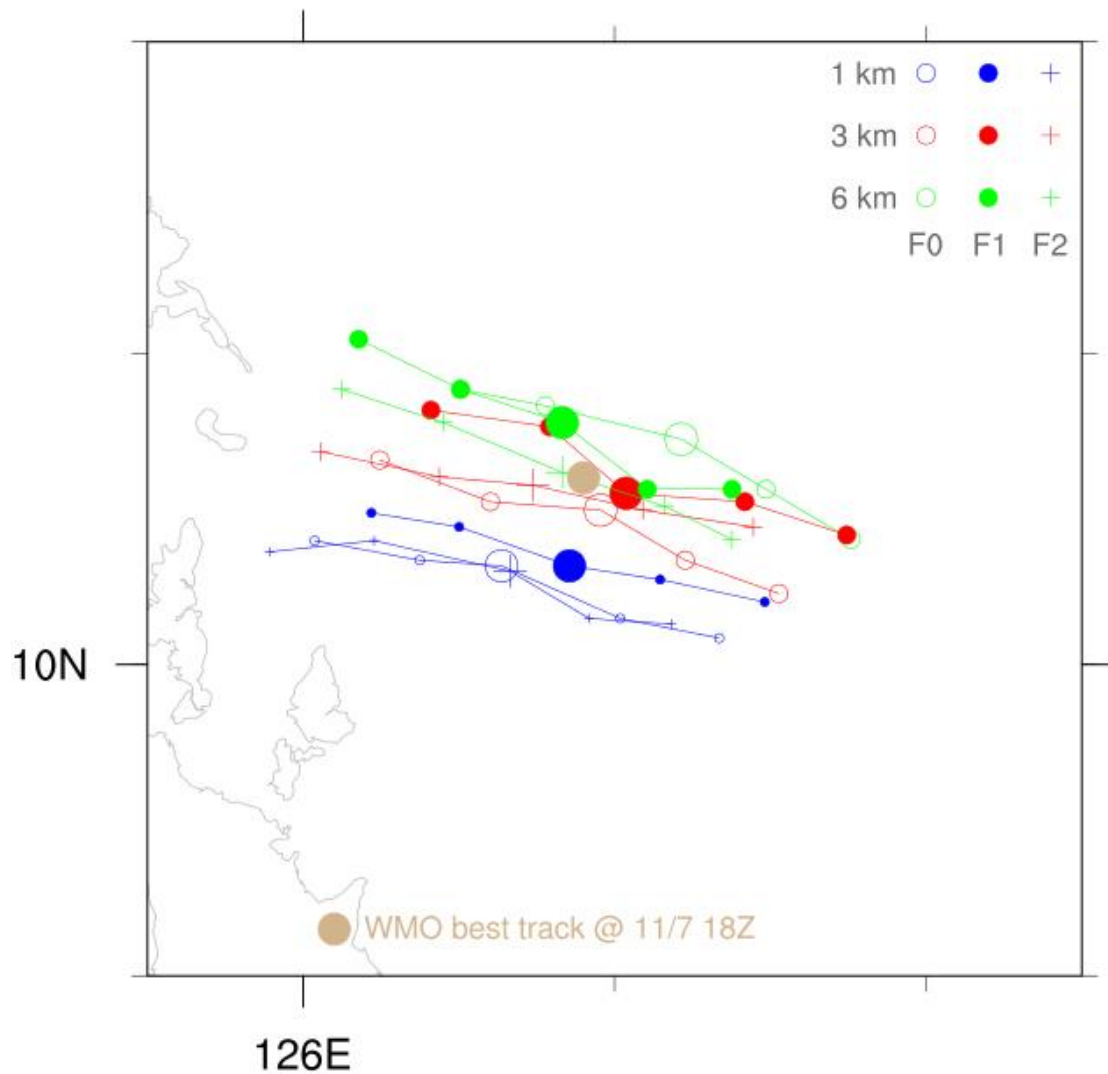

Fig. S2. The simulated tracks and central positions within a 5-hour time slot. For each experiment, the central time of the 5-hour time slot for the hourly positions is taken as the simulated typhoon centered at its nearest location upon the best-track location at 1800UTC 7 November 2013. The simulated position at each central time of the respective 5-hour time slot is denoted by a larger symbol. The dot in tan denotes the WMO best track positions at 1800UTC 7 November 2013.
